# Supplementary material
Source: PubMed Central journal article supplement (PMC6044431)
Supplement: NIHMS979538-supplement-Supplement_2.pdf [file NIHMS979538-supplement-Supplement_2.pdf]

## Supplementary Online Content

Prajna NV, Krishnan T, Rajaraman R, et al; Mycotic Ulcer Treatment Trial II Group. Effect of oral voriconazole on fungal keratitis in the Mycotic Ulcer Treatment Trial II (MUTT II): a randomized clinical trial. *JAMA Ophthalmol*. Published online October 27, 2016. doi:10.1001/jamaophthalmol.2016.4096

### **eFigure.** Time to Perforation by Treatment Group

This supplementary material has been provided by the authors to give readers additional information about their work.

**eFigure.** Time to Perforation by Treatment Group

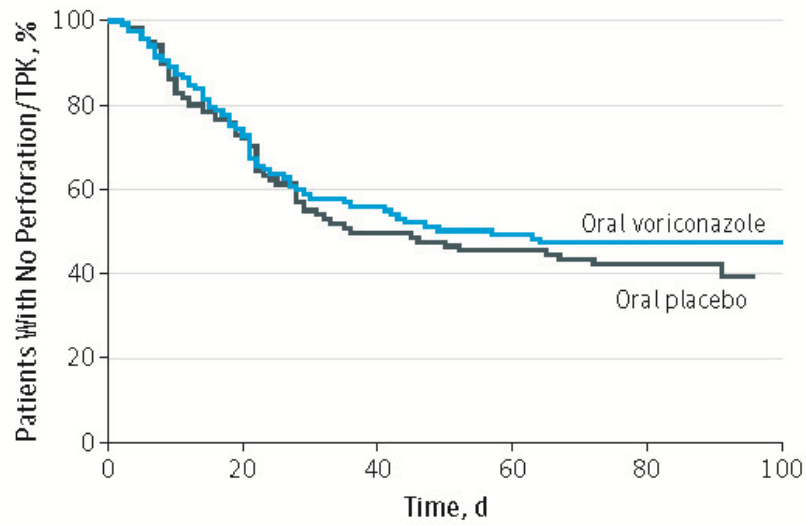

| No. at risk       |     |    |    |    |    |    |
|-------------------|-----|----|----|----|----|----|
| Oral placebo      | 119 | 82 | 47 | 43 | 39 | 10 |
| Oral voriconazole | 118 | 86 | 58 | 51 | 49 | 9  |
